# Supplementary material for: High-Throughput Phenotypic Characterization and Diversity Analysis of Soybean Roots (Glycine max L.)
Source: MDPI journal article supplement (doi:10.3390/plants11152017), 2022-08-02
Supplement: s1 [file s1]

**Table S1.** Soil physical properties.

| Apparent density (Mg/m <sup>2</sup> ) | pH  | Ec (ds/m)  | Soil composition (%)                                                                               |
|---------------------------------------|-----|------------|----------------------------------------------------------------------------------------------------|
| 0.3 $\geq$                            | 5~7 | $\leq$ 1.2 | Cocopeat 51.5; Peatmoss 10; Vermiculite 13; Perlite 15; Zeolite 10; Humic acid 0.1; Fertiliser 0.4 |

**Table S2.** Top and bottom 10 germplasms of each RMT. Each abbreviation indicated total length (LENGTH), surface area (SA), average diameter (DIAM), number of tip (NT), number of fork (NF), link average length (LAL), link average diameter (LAD), and link average branching angle (LABA), respectively.

| Top 10 of RMT |        |             |        | Bottom of 10 of RMT |        |             |        |
|---------------|--------|-------------|--------|---------------------|--------|-------------|--------|
| Rank          | IT No. | LENGTH (cm) | Origin | Rank                | IT No. | LENGTH (cm) | Origin |
| 1             | 208321 | 3228.24     | JPN    | 1                   | 162486 | 703.33      | CHN    |
| 2             | 216313 | 3085.51     | KOR    | 2                   | 168187 | 730.5       | JPN    |
| 3             | 216137 | 2985.57     | KOR    | 3                   | 162133 | 836.83      | JPN    |
| 4             | 285979 | 2849.86     | KOR    | 4                   | 158022 | 880.6       | JPN    |
| 5             | 312160 | 2792.67     | KOR    | 5                   | 160839 | 900.35      | PRK    |
| 6             | 262976 | 2728.39     | KOR    | 6                   | 161747 | 925.22      | CHN    |
| 7             | 263099 | 2723.51     | KOR    | 7                   | 161880 | 932.64      | PRK    |
| 8             | 289377 | 2693.75     | KOR    | 8                   | 161833 | 965.91      | JPN    |
| 9             | 289325 | 2673.7      | KOR    | 9                   | 162431 | 973.37      | CHN    |
| 10            | 162339 | 2649.26     | PRK    | 10                  | 161579 | 976.88      | CHN    |
| Rank          | IT No. | SA (cm)     | Origin | Rank                | IT No. | SA (cm)     | Origin |
| 1             | 208321 | 524.13      | JPN    | 1                   | 162486 | 124.15      | CHN    |
| 2             | 216313 | 508.39      | KOR    | 2                   | 161747 | 127.66      | CHN    |
| 3             | 285979 | 476.6       | KOR    | 3                   | 168187 | 131.04      | JPN    |
| 4             | 177193 | 466.83      | KOR    | 4                   | 158022 | 145.79      | JPN    |
| 5             | 262976 | 454.23      | KOR    | 5                   | 162133 | 149.57      | JPN    |
| 6             | 185311 | 449.9       | JPN    | 6                   | 319450 | 153.89      | JPN    |
| 7             | 263250 | 445.02      | KOR    | 7                   | 161579 | 156.37      | CHN    |
| 8             | 289328 | 443.15      | KOR    | 8                   | 161833 | 156.52      | JPN    |
| 9             | 289325 | 439.16      | KOR    | 9                   | 322902 | 158.7       | KOR    |
| 10            | 162343 | 438.41      | PRK    | 10                  | 158058 | 159.77      | JPN    |
| Rank          | IT No. | DIAM (cm)   | Origin | Rank                | IT No. | DIAM (cm)   | Origin |
| 1             | 242607 | 0.68        | KOR    | 1                   | 284095 | 0.41        | JPN    |
| 2             | 160851 | 0.65        | PRK    | 2                   | 216137 | 0.42        | KOR    |
| 3             | 162614 | 0.65        | PRK    | 3                   | 216138 | 0.43        | KOR    |
| 4             | 162021 | 0.65        | JPN    | 4                   | 319452 | 0.43        | JPN    |
| 5             | 160839 | 0.65        | PRK    | 5                   | 262888 | 0.43        | JPN    |
| 6             | 162406 | 0.64        | CHN    | 6                   | 219522 | 0.44        | KOR    |
| 7             | 161880 | 0.64        | PRK    | 7                   | 161747 | 0.44        | CHN    |
| 8             | 237550 | 0.63        | KOR    | 8                   | 161746 | 0.45        | CHN    |
| 9             | 269586 | 0.63        | JPN    | 9                   | 212802 | 0.45        | KOR    |
| 10            | 242608 | 0.63        | KOR    | 10                  | 219511 | 0.45        | KOR    |
| Rank          | IT No. | NT (Number) | Origin | Rank                | IT No. | NT (Number) | Origin |
| 1             | 263099 | 3305.67     | KOR    | 1                   | 162486 | 622.67      | CHN    |
| 2             | 177192 | 3249.33     | KOR    | 2                   | 162133 | 624.67      | JPN    |
| 3             | 185276 | 3213.33     | JPN    | 3                   | 162614 | 653         | PRK    |
| 4             | 216313 | 3192.67     | KOR    | 4                   | 160839 | 766.67      | PRK    |
| 5             | 263100 | 3167.33     | KOR    | 5                   | 158022 | 867.33      | JPN    |
| 6             | 289325 | 3134        | KOR    | 6                   | 162508 | 898.67      | CHN    |

| 7    | 216137 | 3097          | KOR    | 7    | 162514 | 908           | CHN    |
|------|--------|---------------|--------|------|--------|---------------|--------|
| 8    | 216139 | 3012.67       | KOR    | 8    | 231347 | 913           | KOR    |
| 9    | 168180 | 2990          | CHN    | 9    | 224891 | 918.67        | JPN    |
| 10   | 263098 | 2974          | KOR    | 10   | 162371 | 921.33        | CHN    |
| Rank | IT No. | NF (Number)   | Origin | Rank | IT No. | NF (Number)   | Origin |
| 1    | 216313 | 11638.33      | KOR    | 1    | 162486 | 1180          | CHN    |
| 2    | 208321 | 11289.67      | JPN    | 2    | 168187 | 1342.67       | JPN    |
| 3    | 285979 | 11099         | KOR    | 3    | 161747 | 1638.33       | CHN    |
| 4    | 185311 | 9922          | JPN    | 4    | 162133 | 1848.33       | JPN    |
| 5    | 162039 | 9383          | JPN    | 5    | 161833 | 2100          | JPN    |
| 6    | 177193 | 9372.33       | KOR    | 6    | 161579 | 2114.67       | CHN    |
| 7    | 285978 | 9283          | KOR    | 7    | 158022 | 2138          | JPN    |
| 8    | 289325 | 9066          | KOR    | 8    | 161740 | 2154          | CHN    |
| 9    | 289377 | 8977          | KOR    | 9    | 162139 | 2201.67       | PRK    |
| 10   | 289274 | 8948.67       | KOR    | 10   | 319450 | 2239.67       | JPN    |
| Rank | IT No. | LAL (Number)  | Origin | Rank | IT No. | LAL (Number)  | Origin |
| 1    | 160933 | 0.38          | PRK    | 1    | 285978 | 0.15          | KOR    |
| 2    | 322902 | 0.34          | KOR    | 2    | 285979 | 0.16          | KOR    |
| 3    | 162486 | 0.34          | CHN    | 3    | 185311 | 0.16          | JPN    |
| 4    | 158058 | 0.33          | JPN    | 4    | 160955 | 0.16          | JPN    |
| 5    | 161579 | 0.31          | CHN    | 5    | 224517 | 0.16          | KOR    |
| 6    | 267358 | 0.3           | JPN    | 6    | 162150 | 0.16          | PRK    |
| 7    | 162106 | 0.3           | PRK    | 7    | 173051 | 0.16          | JPN    |
| 8    | 162192 | 0.3           | CHN    | 8    | 269645 | 0.16          | KOR    |
| 9    | 161740 | 0.3           | CHN    | 9    | 162256 | 0.16          | PRK    |
| 10   | 161833 | 0.3           | JPN    | 10   | 160812 | 0.16          | PRK    |
| Rank | IT No. | LAD (Number)  | Origin | Rank | IT No. | LAD (Number)  | Origin |
| 1    | 242607 | 0.73          | KOR    | 1    | 284095 | 0.39          | JPN    |
| 2    | 160851 | 0.73          | PRK    | 2    | 161747 | 0.41          | CHN    |
| 3    | 289329 | 0.7           | KOR    | 3    | 216137 | 0.42          | KOR    |
| 4    | 160839 | 0.7           | PRK    | 4    | 216138 | 0.43          | KOR    |
| 5    | 162614 | 0.69          | PRK    | 5    | 262888 | 0.43          | JPN    |
| 6    | 162021 | 0.69          | JPN    | 6    | 319452 | 0.45          | JPN    |
| 7    | 162320 | 0.67          | PRK    | 7    | 212802 | 0.45          | KOR    |
| 8    | 143185 | 0.67          | JPN    | 8    | 161746 | 0.46          | CHN    |
| 9    | 185290 | 0.67          | JPN    | 9    | 231346 | 0.46          | KOR    |
| 10   | 269607 | 0.67          | KOR    | 10   | 219522 | 0.46          | KOR    |
| Rank | IT No. | LABA (Degree) | Origin | Rank | IT No. | LABA (Degree) | Origin |
| 1    | 224894 | 82.51         | JPN    | 1    | 162458 | 9.15          | PRK    |
| 2    | 161878 | 71.7          | PRK    | 2    | 162074 | 9.91          | JPN    |
| 3    | 161623 | 58.85         | CHN    | 3    | 162526 | 13.07         | CHN    |
| 4    | 229083 | 58.78         | KOR    | 4    | 162339 | 17.05         | PRK    |
| 5    | 263095 | 57.68         | KOR    | 5    | 162133 | 17.8          | JPN    |
| 6    | 185311 | 57.2          | JPN    | 6    | 224516 | 17.87         | KOR    |
| 7    | 185290 | 57.11         | JPN    | 7    | 319451 | 18.01         | JPN    |
| 8    | 285978 | 57.03         | KOR    | 8    | 242607 | 18.01         | KOR    |
| 9    | 185237 | 56.95         | JPN    | 9    | 280127 | 18.12         | JPN    |
| 10   | 162711 | 56.92         | JPN    | 10   | 162579 | 18.2          | CHN    |

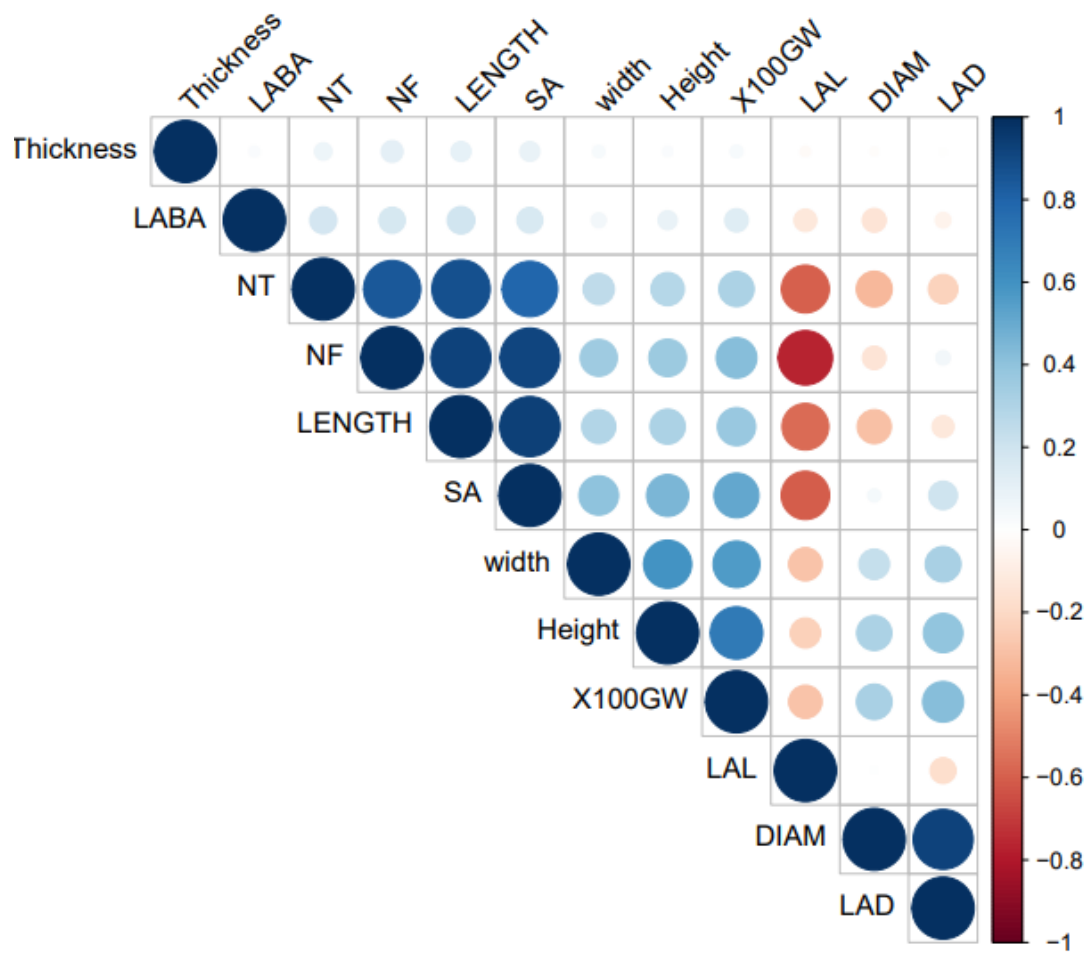

**Figure S1.** Correlation analysis of eight root morphological traits with seed morphological traits. Width (width of seed); Height (height of seed); 100GW (100-seed weight).
